# Supplementary material for: Machine-learning-assisted search for functional materials over extended chemical space
Source: Royal Society of Chemistry journal article supplement (doi:10.1039/d0mh00881h), 2020-01-01
Supplement: d0mh00881h1.csv [file d0mh00881h1.csv]

composition	space_group	bulk_modulus	shear_modulus	harmonic_mean
Ni1C3	166	365	393	378.5
C1N4	225	370	373	371.5
Ni1N5O3	194	365	377	370.9
Re1W4C4N2	225	366	373	369.5
Re1W4C1N3	127	364	373	368.4
C1N1	194	368	368	368.0
Ni1C4	166	367	367	367.0
Ru4C5	225	351	384	366.8
B1O3	225	356	378	366.7
C2N1	194	351	383	366.3
Re2Ni1W4C1N3	225	360	371	365.4
Ni1C2	166	352	379	365.0
Ni1C4	166	360	367	363.5
C2N1	227	348	380	363.3
Tb4Sc1Nb1V6	227	349	378	362.9
Ru1C1	225	351	375	362.6
N1O1	194	359	366	362.5
C6N5O1	123	365	360	362.5
C1N4	194	353	371	361.8
C1O2	191	327	405	361.8
Ni1C3	166	359	364	361.5
Re1C2	191	353	370	361.3
Nd1C2N2	194	359	363	361.0
Ni2C4N2O3	194	358	363	360.5
B1O2	225	357	364	360.5
C3N1	227	341	381	359.9
Cr4C5	225	348	372	359.6
Ru1C6	225	348	371	359.1
Ni1C2	123	347	372	359.1
C2N3	194	351	367	358.8
C1O1	191	324	402	358.8
C1O2	191	325	400	358.6
Th4V1C5N2	194	336	383	358.0
Ni2N6O1	12	361	354	357.5
N1O5	123	356	359	357.5
C2N1	225	343	373	357.4
V1N4	166	375	341	357.2
Ru1C1	225	345	370	357.1
C1O2	225	345	370	357.1
Ni2C6O1	166	336	381	357.1
Ru3C1	225	345	369	356.6
Ni1C4	123	334	382	356.4
N2O1	225	348	365	356.3
Ni1C3	123	332	384	356.1
Ni1N2	225	352	360	356.0
W1N1	127	347	365	355.8
W1C4	225	348	364	355.8
Ni1C3	166	353	358	355.5
W1C5	225	354	357	355.5
W3C4	225	349	362	355.4
V1C2N1	194	346	365	355.2
C6N5O1	225	352	358	355.0
N4Cl6O1	225	353	356	354.5
Nd3W1C5	225	354	355	354.5
Ru1C1	225	350	359	354.4
Si2O1	225	340	370	354.4
Cr1N4	225	339	371	354.3
Er1Mn1	225	334	377	354.2
Th2C1N1	194	333	378	354.1
N1O4	225	342	367	354.1
Ni3N2	225	358	350	354.0
Si2Au1C3	225	322	393	354.0
Ni1C4	225	362	346	353.8
N1O1	225	343	365	353.7
Ta1C5	225	333	377	353.6
Ru2C1	225	355	352	353.5
C2N1	225	359	348	353.4
Ru3C2	225	337	371	353.2
Re1N3	225	350	356	353.0
Th1C3	225	331	378	352.9
C2N3	225	345	361	352.8
Ta1C2	225	332	376	352.6
Nd2C3	191	332	376	352.6
B1C3	123	336	371	352.6
C2N3	194	341	365	352.6
Ru2C3	225	340	366	352.5
Ru2C1	225	350	355	352.5
Ho1W3	225	366	340	352.5
Ni1C3	123	328	381	352.5
Nd1C4	194	347	358	352.4
Ta1C1	225	330	378	352.4
N1O1	225	360	345	352.3
Cr1N4	225	341	364	352.1
Th3W1C5N2	194	331	376	352.1
Ru2C1	225	351	353	352.0
Ni1C4	191	339	366	352.0
C1O2	191	324	385	351.9
Nd1Fe1C6	225	332	374	351.8
Ni1C3	123	335	370	351.6
Th3W1C5N3	194	334	371	351.5
W1C2	225	344	359	351.3
Nd3N2	225	334	370	351.1
V3C2N5	225	375	330	351.1
N1O5	123	348	354	351.0
N1O4	123	349	353	351.0
N1O1	225	348	354	351.0
Ru1C5	225	342	360	350.8
Ru1C3	225	341	361	350.7
Ru1C2N3	123	329	375	350.5
Mn1O2	191	345	356	350.4
C2N1	225	355	346	350.4
N2O1	225	342	359	350.3
Cr1N3	225	340	361	350.2
B1C2	123	333	369	350.1
B1N2	225	350	350	350.0
Nd2V3Si5C1	166	345	355	349.9
Ru3C4	225	335	366	349.8
Cr1O3	225	359	341	349.8
C1N2	139	342	358	349.8
V2W1C6N2	194	323	381	349.6
Os1Ru4C4	225	337	363	349.5
Ni2C3N2	194	352	347	349.5
Th3W2C4N1	225	364	336	349.4
Re1N3	191	341	358	349.3
V1W1C2N1	194	324	379	349.3
C1N3O3	123	342	357	349.3
Cr1C1	194	334	366	349.3
C1N2	225	338	361	349.1
C1O2	194	351	347	349.0
N1O3	123	351	347	349.0
C1N2	225	343	355	348.9
Nd1Ni3	225	356	342	348.9
Re1W4N2	127	344	354	348.9
C3N4	225	335	364	348.9
C1N3	227	354	344	348.9
C1N2	194	343	355	348.9
Ni1C3	225	323	379	348.8
Ni1C3	227	357	341	348.8
N2O1	194	359	339	348.7
V1C4N5	194	338	360	348.7
Nd4C1N3	225	325	376	348.6
N1O2	123	347	350	348.5
C2N1	194	327	373	348.5
B1N2	123	350	347	348.5
W2N1	127	349	348	348.5
Ru3C4	166	335	363	348.4
Nd1C4	191	342	355	348.4
Ni1C4	166	355	342	348.4
Ru3C2	225	356	341	348.3
Ni1C2	225	320	382	348.3
Ni1C1N6	225	329	370	348.3
C1O2	191	328	371	348.2
Nd2W6C3	227	331	367	348.1
Cr1N2	227	350	346	348.0
Ta3N2O6	194	352	344	348.0
V1C3N1	225	362	335	348.0
Re3C4N2	225	341	355	347.9
Nd5B2C3	191	343	353	347.9
Ti2O1	123	329	369	347.9
Nd3Si6C2	166	341	355	347.9
N1O2	123	357	339	347.8
Ta1Ni4C1	225	339	357	347.8
Ta2C3	225	324	375	347.6
Tm1C2	63	345	350	347.5
N1O2	194	350	345	347.5
C2O3	71	333	363	347.4
C3N1	225	339	356	347.3
C3N1	225	338	357	347.2
Ni3C1N1	225	359	336	347.1
N2O1	225	335	360	347.1
Ru1C2	225	345	349	347.0
Tb3Sc1Mo4	225	346	348	347.0
Cr1N2	227	350	344	347.0
Mn1C5N3O1	123	349	345	347.0
Re1W3N6	225	339	355	346.8
Th1W1C4N2	194	319	380	346.8
Ni1C4	123	332	363	346.8
Nd1Ni3C5	225	358	336	346.7
Er1O2	225	357	337	346.7
Ni1C4	225	316	384	346.7
Ni1C2	123	335	359	346.6
V1N4	225	349	344	346.5
Ru2C1	225	344	349	346.5
C3N2	225	350	343	346.5
Cr1N1	191	350	343	346.5
N1O3	123	334	360	346.5
N1O4	123	345	348	346.5
W1O2	194	344	349	346.5
Ni1C3N5	225	349	344	346.5
C1N4	225	349	344	346.5
Ni1C4N4	225	342	351	346.4
N1O3	123	340	353	346.4
N1O5	123	351	342	346.4
N1O1	225	333	361	346.4
C1O2	71	341	352	346.4
C1N2	139	342	351	346.4
Cr1Re1	225	342	351	346.4
Ni1C2	225	355	338	346.3
Mn2C3N3	194	324	372	346.3
Nd5Ni2C3	225	355	338	346.3
Nd1Ni4	225	356	337	346.2
C1O4	71	335	358	346.1
Ru4C5	225	333	360	346.0
Cr3N4	227	347	345	346.0
Nd1W1C4	225	328	366	346.0
N1O3	123	349	343	346.0
Ho2W3	225	359	334	346.0
Ni4C2N3	225	353	339	345.9
Ni4C2N1	225	352	340	345.9
C3N1	194	339	353	345.9
N2O5	225	351	341	345.9
C2N1	225	352	340	345.9
Mn1O1	225	331	362	345.8
Ta1C2	221	337	355	345.8
Re1N5	225	338	354	345.8
C3N1	225	355	337	345.8
Ru1C4	225	334	358	345.6
Cr1N2	191	343	348	345.5
Ni4C2O1	227	348	343	345.5
C3N1	225	344	347	345.5
C2N1	225	345	346	345.5
B6Mo1C2	225	344	347	345.5
Nd2Si6C1	166	343	348	345.5
C1N3	225	339	352	345.4
Ni3N1	225	360	332	345.4
Zr1Si2O2	225	339	352	345.4
N1O1	225	331	361	345.3
Ta3C5	225	337	354	345.3
B1C3	139	317	379	345.2
Ru3C2	225	345	345	345.0
B1C3	225	318	377	345.0
N1O3	123	343	347	345.0
W3C1O6	225	344	346	345.0
Nd1C1	225	331	360	344.9
Ta3B1C2	225	339	351	344.9
Cr1N1	191	336	354	344.8
Ni2C2N1	225	353	337	344.8
N1O5	123	353	337	344.8
Ni1C4	123	333	357	344.6
C1O1	191	333	357	344.6
Cr1N2	227	346	343	344.5
Ni1C4	227	341	348	344.5
Ru4C3	225	331	359	344.4
C2N2O3	139	350	339	344.4
C2N3	225	349	340	344.4
C1N3	194	350	339	344.4
N1O1	225	337	352	344.3
Mo1O4	225	312	384	344.3
C1N3	225	330	360	344.3
Cr2Br5N1	191	335	354	344.2
Cr1O1	225	354	335	344.2
Nd1C2	225	320	372	344.0
Cr1N1	191	340	348	344.0
C5N1O3	123	341	347	344.0
B2Ir2N1O3	225	326	364	344.0
Nd3Ti3N5	225	323	368	344.0
C1N1	225	348	340	344.0
Ni1N1	225	350	338	343.9
N2O1	225	337	351	343.9
Nd1Ti5N3	225	314	380	343.9
Ta2C3	225	321	370	343.8
N1O1	194	362	327	343.6
Nd1N1	225	323	367	343.6
Ru4C5	225	340	347	343.5
Ni3N4	225	340	347	343.5
Re1N4	194	331	357	343.5
Ru1C1	225	328	360	343.3
Ni1C1	225	336	351	343.3
C4N1O5	139	352	335	343.3
Ta1W3O5	225	336	351	343.3
C2N1	225	354	333	343.2
Ti1C4	225	327	361	343.2
B1N3	123	355	332	343.1
Cr1N4	225	330	357	343.0
N1O5	123	347	339	343.0
B1N1	123	345	341	343.0
Sc1N1	225	346	340	343.0
V3C2	227	347	339	343.0
Ni3C4	225	348	338	342.9
Cr1Co2Si1	225	336	350	342.9
Cr3N4	191	338	348	342.9
Ni1N1	225	349	337	342.9
Nd2Ni1C1	225	349	337	342.9
Ni3C4N1	225	348	338	342.9
B1N3	194	336	350	342.9
Ni1C4	123	321	368	342.9
N1O3	123	351	335	342.8
Mn1C4	123	324	364	342.8
W3C1N1	227	328	359	342.8
Ni1C4	123	328	359	342.8
Ni1C4	123	327	360	342.7
Ni1C4	123	323	365	342.7
Ga1C3	139	314	377	342.6
Nd1C2	166	326	361	342.6
C1N4	225	341	344	342.5
N2O5	225	344	341	342.5
Nd3Ti1N4	225	321	367	342.5
Cr1N2	191	338	347	342.4
Re1O2	225	337	348	342.4
B1N5O3	225	329	357	342.4
Re1N4	139	338	347	342.4
Ru1C2	225	335	350	342.3
Ru1C5	225	351	334	342.3
C2N1O3	139	351	334	342.3
Ni3N1	225	353	332	342.2
Ni2O3	166	326	360	342.2
Ni2C3	123	326	360	342.2
Ho1W1	225	354	331	342.1
Sc4Fe1Si6	123	345	339	342.0
C3N2O6	123	343	341	342.0
N1O1	225	339	345	342.0
W1C2	225	340	344	342.0
C1O1	225	347	337	341.9
V2C1N3	166	362	324	341.9
Ta2C3	225	319	368	341.8
C3N1	225	350	334	341.8
Cr3Br6N2	191	332	352	341.7
N1O1	191	359	326	341.7
N1O1	194	352	332	341.7
Ni1C2	225	316	372	341.7
Ni1C2N1	123	332	352	341.7
Th1V1W1C2N3	194	318	369	341.6
Mg1V3C6N2	166	365	321	341.6
Cr1Co2	225	340	343	341.5
N1O2	194	344	339	341.5
C1N2	225	340	343	341.5
C1N4	194	339	344	341.5
C3N2	225	341	342	341.5
W1C5	225	341	342	341.5
C3N1	225	335	348	341.4
C3N1	225	347	336	341.4
Ni2O3	194	327	357	341.3
Ce3Er1O4	225	333	350	341.3
Nd1W4C5	225	334	349	341.3
Si1O1	225	332	351	341.2
Sr5N3O4	225	332	351	341.2
V3C5N4	225	360	324	341.1
Ru3C1	225	337	345	341.0
Ni4C1N1	225	342	340	341.0
N2O5	194	343	339	341.0
Sr1N2O2	123	341	341	341.0
Nd1C4	123	329	354	341.0
Ni1C3	123	329	354	341.0
W3C4	225	344	338	341.0
B1C1	225	342	340	341.0
N1O1	194	347	335	340.9
Nd2Co1C3	191	346	336	340.9
C3N1	225	348	334	340.9
Nd2Ni1C1	225	349	333	340.8
Mo1C5N3	227	349	333	340.8
N2O1	225	357	326	340.8
Ni1C2	139	318	367	340.7
Ti1C2	225	320	364	340.6
C2N1	194	338	343	340.5
V1N5	225	336	345	340.4
Ta1C2	221	334	347	340.4
Fe1C4N2	225	334	347	340.4
Th4Ir1C4N1	225	335	346	340.4
Cr1Re1N6	225	349	332	340.3
C2N1	225	348	333	340.3
C2O1	166	318	366	340.3
Mn2C4N1O2	194	324	358	340.2
Ni1C3	225	306	383	340.2
Th2C3	225	325	357	340.2
Ni1C4	123	330	351	340.2
Ni1C3	123	329	352	340.1
W1C4N1	225	352	329	340.1
Ni1C3N5	225	336	344	340.0
B3C1O4	166	327	354	340.0
Cr1N6	227	340	340	340.0
N1O2	123	341	339	340.0
N2O5	123	341	339	340.0
N1O3	123	344	336	340.0
Ni1C1N2	194	337	343	340.0
Ni1C2	123	327	354	340.0
C3N1	225	343	337	340.0
N1O2	225	316	368	340.0
Ru1C5	225	335	345	339.9
Sc2Fe3O6	225	333	347	339.9
Nd1Ni6C2	225	349	331	339.8
Mn1C1O2	225	321	361	339.8
Ta1C2	225	317	366	339.7
Ta4C5	225	314	370	339.7
Mn1O3	123	324	357	339.7
Ru2C3N1	123	319	363	339.6
Re3C6N2	194	323	358	339.6
Cr1Br3N1	191	336	343	339.5
Ni2O3	227	341	338	339.5
Ta5B1C3	225	338	341	339.5
Nd1Hf1Ni4C5	191	337	342	339.5
Co3Si5W1C3	225	327	353	339.5
Cr1N1	225	333	346	339.4
V1N3	225	334	345	339.4
Er3Mn2	225	321	360	339.4
As5Os2C3	191	335	344	339.4
C1O3	225	332	347	339.3
Cr2Br2N1	191	331	348	339.3
C1N4	194	347	332	339.3
Nd1C3	194	347	332	339.3
C2N3	225	330	349	339.2
C3N2O2	139	330	349	339.2
C1N2	225	356	324	339.2
Ta1C4	225	329	350	339.2
Ni1C3	225	309	376	339.2
Ca2Mg1V3C5N2	166	350	329	339.2
Ta5B1C3	225	336	342	339.0
C3N4	225	322	358	339.0
Au1C3	225	312	371	339.0
C1O2	71	326	353	339.0
Ni1C3	123	333	345	338.9
C3N1	225	332	346	338.9
Nd4Si6C1N1	227	333	345	338.9
N2O1	225	331	347	338.8
Ni1C2	123	324	355	338.8
Ni1C2	139	316	365	338.7
Mn1W3N1O6	225	356	323	338.7
Ho1Th5Ge2W1C2	225	356	323	338.7
Nd1C3	225	327	351	338.6
Si1C1	225	327	351	338.6
Mn3C5N2O1	123	328	350	338.6
Nd3N2	225	322	357	338.6
Ni1C4	123	327	351	338.6
C3N1	225	357	322	338.6
Cr3N5	227	335	342	338.5
Ni1C2N2	129	337	340	338.5
C3N1	225	335	342	338.5
Ta3W4C4	225	336	341	338.5
Ni1C3N1	225	345	332	338.4
N1O2	123	343	334	338.4
Nd1C1	225	343	334	338.4
N1O3	194	346	331	338.3
Ru1C4	225	331	346	338.3
Ni1C4	225	313	368	338.3
V4C1N5	166	360	319	338.3
C1N2	63	324	354	338.3
C1O4	71	328	349	338.2
Ta3C4	225	318	361	338.1
C1O3	71	318	361	338.1
Ru1C5	225	321	357	338.0
Ni1C2	225	342	334	338.0
N2O1	194	341	335	338.0
Ta1C2	225	339	337	338.0
Ni2C3	139	314	366	338.0
Al1Ni1	225	335	341	338.0
N2O1	194	345	331	337.9
Ni1N2	191	343	333	337.9
C1N2	225	332	344	337.9
Ni1N3	225	331	345	337.9
N1O2	225	318	360	337.7
Ni1C2	139	314	365	337.6
C1O4	225	335	340	337.5
C1O2	225	337	338	337.5
Cr1N1	227	334	341	337.5
Na2C1	191	339	336	337.5
Re1N1	225	337	338	337.5
Sm1Ni2C4	225	340	335	337.5
Ni1C1	225	335	340	337.5
W1C6	139	332	343	337.4
Cr4Br2N3	191	331	344	337.4
C2O1	123	342	333	337.4
Ni1C2	139	313	366	337.4
Ni1C1	166	342	333	337.4
Nd1Ni4	225	345	330	337.3
Ce3Nd1C4	139	323	353	337.3
C1O1	166	346	329	337.3
B1Ru1	225	322	354	337.2
N2O3	194	349	326	337.1
C1N2	63	321	355	337.1
Ni5C1N1	225	341	333	337.0
Co1Si2	225	336	338	337.0
C2N3O4	139	351	324	337.0
W1C2	225	339	335	337.0
C1N2	194	340	334	337.0
C2N1	225	336	338	337.0
Mg1V2	225	320	356	337.0
Cr1N1	227	332	342	336.9
C2N1O1	123	342	332	336.9
Nd4Ta6C1	225	343	331	336.9
Ni1C4	123	332	342	336.9
Ni1C4	123	323	352	336.9
C1O4	71	318	358	336.8
Fe1C3	225	358	318	336.8
C3N1	225	353	322	336.8
Co3Si1	139	329	345	336.8
Tm1C3	63	327	347	336.7
Ni2C2N3	194	327	347	336.7
Ni1C4	123	311	367	336.7
B1C1	123	317	359	336.7
Ru1C6	225	320	355	336.6
Nd2Ta1C1	63	325	349	336.6
Ru1C3	225	336	337	336.5
Cr2Br5N1	191	330	343	336.4
Mn2C6N1	123	332	341	336.4
Ce1O4	139	323	351	336.4
Ta2W3C4	225	341	332	336.4
Cr1Br2N1	191	328	345	336.3
B2C1	225	317	358	336.3
Ni1C1	139	314	362	336.3
Nd5Ti1N3	225	317	358	336.3
Ni2N1	225	346	327	336.2
Ni1C1	225	306	373	336.2
Ta1Ni5C5	221	346	327	336.2
Mn2W2C6N1	123	325	348	336.1
Ta1C2	225	320	354	336.1
Ho2W1C1	225	348	325	336.1
C2O3	191	297	387	336.1
Cr1N1	191	335	337	336.0
Pb1N2	225	334	338	336.0
N2O3	194	340	332	336.0
Ni1C2	225	335	337	336.0
Fe1C6	225	338	334	336.0
Fe1Ni1C6	225	324	349	336.0
Ta4C3	225	315	360	336.0
N2O1	225	335	337	336.0
B1C1	221	324	349	336.0
Ni1C3	123	303	377	336.0
Cr1C1	136	350	323	336.0
Ni1C1	225	333	339	336.0
Mg2N1	225	324	349	336.0
Er1O2	194	342	330	335.9
B1O1	227	329	343	335.9
N1O5	225	318	356	335.9
Cr3Ga1Co5	225	344	328	335.8
Si2Ru1C1	225	321	352	335.8
Nd1Ni3C1	191	344	328	335.8
Ce1Dy1C6	225	328	344	335.8
Ni1C4	123	310	366	335.7
N2O1	191	348	324	335.6
Ni1C3	123	325	347	335.6
C1O2	139	349	323	335.5
Ni1C4	123	318	355	335.5
Nd1Si1	191	336	335	335.5
W2C3N5	194	329	342	335.4
Ni1C1	139	314	360	335.4
P1C4	139	330	341	335.4
Ni1C3	123	329	342	335.4
C1N2	225	331	340	335.4
C3N1	225	340	331	335.4
Th2Ni3C5N1	225	356	317	335.4
B1C3	194	327	344	335.3
Ni1C2N1	225	328	343	335.3
N1O1	225	321	351	335.3
Ho2W3	225	344	327	335.3
C3N1	225	344	327	335.3
U2V5C3	225	326	345	335.2
Ni2C3	139	315	358	335.1
Nd1C3	225	333	337	335.0
Ge2N3O6	225	338	332	335.0
Ta2C3	221	318	354	335.0
Al1C3N5	225	332	338	335.0
V2N3	227	314	359	335.0
Ni1C2	225	336	334	335.0
U1C5	225	321	350	334.9
Ni1C3	225	308	367	334.9
N2O1	225	329	341	334.9
C1O4	71	316	356	334.8
Ni1C3	123	320	351	334.8
Ni1N3	225	351	320	334.8
Nd2Al3Cr6	225	325	345	334.7
As3H2C4	225	314	358	334.6
Fe1O3	225	323	347	334.6
Ni2C3	139	311	362	334.6
C5N2O1	123	332	337	334.5
Ta1C2	221	338	331	334.5
P2C2N1	139	333	336	334.5
C1N1	225	336	333	334.5
Os1C1	139	332	337	334.5
Li3Y2Si1N1O5	139	338	331	334.5
Th1N1	227	329	340	334.4
Nd1Ni2C6N1	225	310	363	334.4
Ta1O1	225	329	340	334.4
C3N1	225	355	316	334.4
C1N1	225	355	316	334.4
N1O5	123	350	320	334.3
Nd1C2	225	342	327	334.3
Ni1C3	194	315	356	334.2
Fe1C3N1	225	344	325	334.2
Co3Si2	225	346	323	334.1
Nd1N1	225	311	361	334.1
Si3Ni4C5	225	311	361	334.1
V1N1	139	337	331	334.0
Ni1C4N3	225	322	347	334.0
B1O3	166	333	335	334.0
N2O1	225	330	338	334.0
N1O1	225	333	335	334.0
N2O1	225	348	321	334.0
Nd1Ga2C6N1	139	298	380	334.0
N2O1	225	339	329	333.9
N1O2	123	327	341	333.9
C1O1	225	329	339	333.9
Ru1C6	225	329	339	333.9
Ni3C4	139	312	359	333.9
W1O4	225	340	328	333.9
Mn2W1N1O5	225	349	320	333.9
Ni1C4	123	312	359	333.9
C2O1	191	296	383	333.9
Ru2C3	225	325	343	333.8
Ni2C5N1	225	326	342	333.8
Tb2C1N3	225	326	342	333.8
Nd1C2	225	344	324	333.7
Ni1C3	123	324	344	333.7
Th4U2C1N4	225	318	351	333.7
V1N1	225	356	314	333.7
N1O1	225	318	351	333.7
Ta1C1	221	322	346	333.6
Ni1C1	139	313	357	333.6
C1O4	225	333	334	333.5
Ni5C1O3	225	335	332	333.5
C1O2	191	336	331	333.5
N1O2	194	334	333	333.5
Sm3Ru1C1N1	166	331	336	333.5
W3N1	225	332	335	333.5
Ni2O3	225	334	333	333.5
Cr1N1	191	327	340	333.4
N1O2	194	339	328	333.4
Nd1Ni1C5N1	225	329	338	333.4
Ni1C1	139	312	358	333.4
Re5W1C5	225	319	349	333.3
C1N3O5	123	326	341	333.3
Ni1C4	123	319	349	333.3
Ni1C2	225	350	318	333.2
N1O1	194	343	324	333.2
Ta2O3	225	324	343	333.2
Cr4C1	225	318	350	333.2
Ni1C1	136	313	356	333.1
B1C2	194	322	345	333.1
Ni1C2	191	322	345	333.1
Li3Nd1C5	225	313	356	333.1
Ru1C1	166	330	336	333.0
N1O1	225	333	333	333.0
Hf1C3	225	331	335	333.0
Ni2N5O1	191	347	320	333.0
Sr2N1	123	329	337	333.0
Fe1C5N2	225	329	337	333.0
Er1Ni2	225	337	329	333.0
Er1Ni2	225	332	334	333.0
B3C1	225	337	329	333.0
Ru2C3	166	339	327	332.9
Ni1C2	123	319	348	332.9
Ba2C1	225	328	338	332.9
B1O2	227	327	339	332.9
Re2W3C1N2	225	341	325	332.8
N1O2	139	341	325	332.8
Nd1Ni2C6N1	225	296	380	332.8
Ta1C5	225	318	349	332.8
Ni1C4	225	307	363	332.7
Ta3C4	225	323	343	332.7
Ru1C5	166	321	345	332.6
N1O1	191	344	322	332.6
Ta1C3	225	312	356	332.6
C2N1	225	345	321	332.6
C3N1	225	345	321	332.6
C3N1	166	315	352	332.5
Ni1C4	191	336	329	332.5
Nd1Ni2C6N1	225	329	336	332.5
Nd3Ga1C4	225	331	334	332.5
C3N1	225	331	334	332.5
Ni1C4	225	298	376	332.5
Ni1C3	123	304	367	332.5
Th2C3	225	335	330	332.5
Pa4C5	225	339	326	332.4
Br3N1	191	327	338	332.4
Ni1N2	65	357	311	332.4
Nd3Cr5Si1C1	225	314	353	332.4
N2O1	225	338	327	332.4
Nd1Ni2C6N1	225	303	368	332.4
Ni1C4	123	328	337	332.4
Th1W3C2N1	225	339	326	332.4
Nd4Si1C5	225	324	341	332.3
N1O1	225	325	340	332.3
Ni1C1	139	310	358	332.3
Fe1C5N1	225	318	348	332.3
As2C1	225	322	343	332.2
N1O1	191	343	322	332.2
B3N2O4	225	322	343	332.2
Ni1C2	194	313	354	332.2
Ta1Ir4C2	225	323	342	332.2
Nd1C3	225	304	366	332.1
Ru2C3	225	319	346	332.0
Ru1C1	225	329	335	332.0
C2O3	225	335	329	332.0
N2O1	225	330	334	332.0
Cr4Co3Si1	225	329	335	332.0
Co3Si5	225	331	333	332.0
C1O1	166	328	336	332.0
Nd1C3	123	320	345	332.0
V3C1N1	194	336	328	332.0
B1Mo1	225	335	329	332.0
Ni1C3	136	305	364	331.9
C3N1	194	339	325	331.9
N1O1	225	339	325	331.9
Hf1C4	225	318	347	331.9
B1O1	227	326	338	331.9
B4Mo4C1N2	225	338	326	331.9
C1O4	225	340	324	331.8
Nd1Cr1C2	191	324	340	331.8
Ta1C3	225	317	348	331.8
Ta1C4	225	317	348	331.8
Nd3Hf1C5	225	340	324	331.8
Ni1N4	225	342	322	331.7
C3N1	123	312	354	331.7
N2O3	225	322	342	331.7
Ni1C3	225	302	368	331.7
Ni1C4	123	322	342	331.7
Re2N1	225	308	359	331.6
C1O4	225	331	332	331.5
N2O1	225	331	332	331.5
Nd1C3	225	314	351	331.5
Ni2C3	139	311	355	331.5
W1N3	227	335	328	331.5
Nd1Ni1C5N1	225	303	366	331.5
C1N2	123	335	328	331.5
W1C1	225	335	328	331.5
B4C2N1	225	335	328	331.5
N1O1	225	314	351	331.5
Mn1N4	225	336	327	331.4
Si1C3	225	325	338	331.4
C2N3O2	139	346	318	331.4
C5N4O3	139	346	318	331.4
V3C2N4	225	360	307	331.4
C3N2	225	337	326	331.4
B2Ru1	225	313	352	331.4
C1O2	139	339	324	331.3
Ni1C3	225	302	367	331.3
B3Mo1C1N1	225	340	323	331.3
N1O1	194	341	322	331.2
Ru5C3N1	166	342	321	331.2
N2O1	225	312	353	331.2
Nd1N4	225	328	334	331.0
Ru1C3	225	334	328	331.0
N1O1	194	335	327	331.0
B3N1	123	330	332	331.0
Ta1C3	221	333	329	331.0
Ti3C4N1	225	319	344	331.0
N1O1	225	327	335	331.0
Ni1C1	139	310	355	331.0
W1O4	225	334	328	331.0
Os3C2	139	330	332	331.0
B5Mo2C3	225	329	333	331.0
Ni1C1N2	225	336	326	330.9
N2O3	225	326	336	330.9
Mn1C4	123	325	337	330.9
Ta2C3	225	302	366	330.9
N1O2	225	336	326	330.9
Ni1C3	123	317	346	330.9
Ni1C2	123	324	338	330.9
V1W3C4	225	338	324	330.9
N1O4	123	341	321	330.7
Fe1H1W1C4	191	311	353	330.7
Nd1C3	191	311	353	330.7
Ni3C4	139	308	357	330.7
Th2Ta1C1	225	308	357	330.7
Ru1C4	225	320	342	330.6
Cr6Br3N1	191	319	343	330.6
C2N1O3	225	314	349	330.6
Ni1C2	139	314	349	330.6
C5N1O3	225	320	342	330.6
Ni1C2	123	314	349	330.6
C3N1	225	320	342	330.6
C3N1	225	342	320	330.6
W2C3	225	320	342	330.6
N1O1	123	310	354	330.5
Th1V1C5N1	194	307	358	330.5
C1O3	139	354	310	330.5
Ni1C1	139	310	354	330.5
W1O1	225	334	327	330.5
N1O1	225	330	331	330.5
Ni2O1	225	333	328	330.5
Ni1C4	123	310	354	330.5
Sm1Ni4C2	225	330	331	330.5
C3N2	225	329	332	330.5
C1N2	225	350	313	330.5
Ta3W3C5	225	329	332	330.5
Ir1W1C4	139	337	324	330.4
Ni1C4	225	325	336	330.4
W1C3	139	324	337	330.4
Re1N2	225	324	337	330.4
Fe2C6N1	225	325	336	330.4
C3N1	225	345	317	330.4
W1C6N4	225	322	339	330.3
Ta2C1	225	316	346	330.3
Ni1C3	225	303	363	330.3
C2O3	225	320	341	330.2
C3N1O6	123	340	321	330.2
Ta2C1	225	311	352	330.2
C2N3	225	320	341	330.2
Al3Ni2C6	225	310	353	330.1
V2N1	225	307	357	330.1
Ni1C3	123	310	353	330.1
Ni1C1N2	225	342	319	330.1
Re1O4	225	333	327	330.0
N2O1	225	329	331	330.0
Ni1C2	225	326	334	330.0
N2O1	194	332	328	330.0
N1O5	194	330	330	330.0
B1N2	123	330	330	330.0
N1O1	63	334	326	330.0
Ni1C3	123	344	317	329.9
C1O4	139	336	324	329.9
Ni1C2	225	325	335	329.9
Fe1C5N1	225	325	335	329.9
N2O1	191	351	311	329.8
Ta3C2	225	311	351	329.8
C1O3	71	311	351	329.8
Hf1Nb4	225	338	322	329.8
Nd1C1	191	320	340	329.7
Ni1N3	191	340	320	329.7
C2N1	139	296	372	329.7
Ni1C2N3	129	319	341	329.6
N1O4	123	341	319	329.6
Ta3C2	225	313	348	329.6
Fe1C4N1	225	319	341	329.6
N1O1	194	332	327	329.5
C3N1O4	225	326	333	329.5
N1O3	123	333	326	329.5
Nd2Ni1C5N3	225	328	331	329.5
Ta1C4	221	327	332	329.5
B1C2	225	328	331	329.5
Ni1C3	194	312	349	329.5
Ni1C1	139	309	353	329.5
Ni1C3	225	292	378	329.5
P2C5N1	139	329	330	329.5
V3C1N2	225	349	312	329.5
C2N3	191	329	330	329.5
Sm3Mn5C2	194	326	333	329.5
Mn1N1O2	63	333	326	329.5
Mn1N3O1	225	325	334	329.4
B2O1	225	324	335	329.4
Ni2N5O1	166	335	324	329.4
N1O3	123	335	324	329.4
C1N3O1	139	344	316	329.4
N1O3	225	316	344	329.4
Gd1C3	225	334	325	329.4
Ni1C1	225	345	315	329.3
C3N1	225	320	339	329.2
Ta2Ir3C4	225	320	339	329.2
Sm2Mn2C1	194	320	339	329.2
N1O1	191	352	309	329.1
Ni1C2	225	318	341	329.1
N1O1	164	330	328	329.0
Zr1Si6O4	225	317	342	329.0
N1O1	194	342	317	329.0
C2O1	123	330	328	329.0
Tm1O3	225	353	308	329.0
Nd1C4	38	327	331	329.0
V1C2N4	166	353	308	329.0
B3Mo4C1	225	328	330	329.0
Ni2C1O3	225	317	342	329.0
C1N2	225	327	331	329.0
Mn1N5	225	343	316	328.9
Ni1C4	225	316	343	328.9
Ni1C4	139	298	367	328.9
V3C4N3	166	349	311	328.9
W1C3	139	314	345	328.8
Co1Si3	225	337	321	328.8
Ta1B4C2	225	320	338	328.8
Ni1O2	225	350	310	328.8
Tb3Re1C1	194	314	345	328.8
C1O2	139	351	309	328.7
C1N2	123	339	319	328.7
Ni1Ge3	225	318	340	328.6
N2O1	225	331	326	328.5
N2O1	225	328	329	328.5
Ni1C2N3	225	331	326	328.5
Ni1C3	139	311	348	328.5
Ni1C4	123	311	348	328.5
B1N1	225	353	307	328.4
W1N2	227	324	333	328.4
Ni3C4	139	306	354	328.3
Nd4Ru1C5	225	337	320	328.3
Fe1C5N2	225	337	320	328.3
Th1W2C4	221	309	350	328.2
Ru2C1	225	318	339	328.2
N1O1	194	339	318	328.2
Hf1C3	225	319	338	328.2
C1N1	194	308	351	328.1
N1O3	123	346	312	328.1
U1C5	225	300	362	328.1
C5N1O5	139	346	312	328.1
Ni2C3	139	308	351	328.1
Ni1C3	225	296	368	328.1
B1C1	194	331	325	328.0
B2O3	225	331	325	328.0
N1O1	194	325	331	328.0
Nd1C2	225	327	329	328.0
N1O4	123	329	327	328.0
N1O4	225	330	326	328.0
Ni3C4	139	307	352	328.0
W1C4	225	324	332	328.0
Nd2Ge1C1N4	225	321	335	327.9
C2N3	225	333	323	327.9
C3N1	139	310	348	327.9
Ta1C4	221	321	335	327.9
Ba1C1	225	334	322	327.9
Nd2C3	225	321	335	327.9
N1O2	194	344	313	327.8
N1O2	123	337	319	327.8
W1C2N3O1	123	336	320	327.8
N1O5	225	336	320	327.8
Fe1C4N1	225	319	337	327.8
V3C1N3	225	353	306	327.8
Ta1C3	225	308	350	327.7
Ni3C4	139	305	354	327.7
C2N1	225	318	338	327.7
Ni1C3	123	312	345	327.7
Ni1C2	139	311	346	327.6
C2O3	225	326	329	327.5
Ta1B5C3	225	324	331	327.5
N1O4	123	330	325	327.5
Nd1Ni2C6N1	225	324	331	327.5
Nd4P1C6	123	310	347	327.5
C1N2	194	331	324	327.5
Gd1C1	225	341	315	327.5
Mn2O5	63	330	325	327.5
C1O4	225	334	321	327.4
Ni1C3	191	342	314	327.4
N1O1	194	323	332	327.4
Ni1N3	65	342	314	327.4
Mn1C3	123	323	332	327.4
Ni1C3	139	314	342	327.4
N1O1	225	336	319	327.3
Ni1C1N2	225	320	335	327.3
C2O1	225	320	335	327.3
B1C3	225	300	360	327.3
Nd2Os1C5	225	320	335	327.3
Nd4Al1C3	225	336	319	327.3
Nd2Ni1C3	225	313	343	327.3
Ta3C4	194	318	337	327.2
Mn2N3O6	225	338	317	327.2
Mn2W1N2O6	225	338	317	327.2
Mn2C1O3	225	308	349	327.2
B6Ru1C2	225	312	344	327.2
Er2O3	225	345	311	327.1
C1O2	225	327	327	327.0
C1O3	225	329	325	327.0
N1O1	225	325	329	327.0
Re2N3	225	310	346	327.0
B1C3	194	323	331	327.0
Ru1C4	166	324	330	327.0
Ba3C2	225	330	324	327.0
Nd1C2	225	326	328	327.0
Ni1C3	123	306	351	327.0
Sm1Ni2C2	225	328	326	327.0
Y1V2C6N1	225	351	306	327.0
Ta1Ir4C3	225	324	330	327.0
Ta1C5	225	310	346	327.0
V1Cl5	225	321	333	326.9
Cr1Br2	191	321	333	326.9
Er1Mn2	225	320	334	326.9
N1O5	123	334	320	326.9
Nd6C5N1	225	332	322	326.9
Nd1Cr4Co4C1	225	303	355	326.9
C1N4	194	333	321	326.9
Si1C2N2	225	321	333	326.9
Nd2V1W5C3	225	321	333	326.9
Mn2N1O5	63	334	320	326.9
Nd1Zn3Co1C3N2	225	319	335	326.8
Ta2C3	225	308	348	326.8
Fe1C4N1	225	308	348	326.8
Ni3C4	139	305	352	326.8
Nd2C1N5	194	343	312	326.8
C3N1	225	319	335	326.8
V1N5	225	337	317	326.7
Mn1C5	225	317	337	326.7
Ru1C3	225	310	345	326.6
C2N1	225	339	315	326.6
N2O1	166	324	329	326.5
Cr2Br5N1	191	324	329	326.5
Ni4C1	225	330	323	326.5
N2O3	194	328	325	326.5
N1O1	194	328	325	326.5
C4N1O1	225	329	324	326.5
N1O4	225	323	330	326.5
N1O4	225	324	329	326.5
C2N1	194	330	323	326.5
Sm2Ni3O6	139	306	350	326.5
C1N1	191	333	320	326.4
Ni1C1N2	194	312	342	326.3
N1O5	123	342	312	326.3
Fe1C6	225	318	335	326.3
Ta1O1	166	319	334	326.3
Ag3Pb1C5	139	312	342	326.3
Hf1O2	225	335	318	326.3
Nd4Ni6C1	191	311	343	326.2
Si1C4N3	225	336	317	326.2
Nd6Pb1C2	225	303	353	326.1
Sc1Fe2O4	225	315	338	326.1
C3N1	139	296	363	326.1
V2N3	166	360	298	326.1
W2C3	225	315	338	326.1
Ti1B5N3	225	315	338	326.1
Ni1C2	225	339	314	326.0
N2O1	166	322	330	326.0
C1O2	166	330	322	326.0
Ru3C1N1	166	324	328	326.0
Re3Ni1W3C1N2	225	345	309	326.0
C1N4	139	325	327	326.0
Ta4W1C5N1	225	327	325	326.0
C1N3	191	329	323	326.0
Mn1N4O1	225	321	331	325.9
Ce5Mn2N3	225	331	321	325.9
Cr3Br4N1	191	321	331	325.9
B2O3	225	321	331	325.9
Ta2C1	225	332	320	325.9
Nd2Ni4O5	225	321	331	325.9
Nd1C1N2	225	318	334	325.8
Ni3C2	136	304	351	325.8
Sr2C3N1O6	123	334	318	325.8
N1O2	123	342	311	325.8
Li1Ce3Nd1C6	191	317	335	325.8
